# Supplementary material for: A longitudinal prospective cohort study investigating the association of premilking stimulation and teat-end shape on milking characteristics and teat tissue condition in dairy cows
Source: BMC Vet Res. 2019 Feb 12;15:58. doi: 10.1186/s12917-019-1803-2 (PMC6373114; doi:10.1186/s12917-019-1803-2)
Supplement: Supplementary file 3 — Tabel S3-S6. General linear mixed model results describing the factors associated with total milk yield, two-minute milk yield, milking unit-on time, and time in low milk flow rate from 384 milking observations of 129 cows. (DOCX 19 kb) [file 12917_2019_1803_MOESM3_ESM.docx]

**Supplementary Table 3.** Multivariable general linear mixed model describing the factors associated with total milk yield (kg) from 384 milking observations of 129 cows.

| Item | β1 (SE) | *p* | LSM2 (SE) |
| --- | --- | --- | --- |
| Intercept | 13.3 (0.5) | <0.001 | – |
| Milking session |  | <0.001 |  |
| Milking #1 | 1.5 (0.2)a |  | 15.7 (0.3) |
| Milking #2 | -2.5 (0.2)b |  | 11.6 (0.3) |
| Milking #3 | -Referent-c |  | 14.1 (0.3) |
| Parity |  | <0.001 |  |
| 1st | -2.3 (0.6)a |  | 12.1 (0.4) |
| 2nd | 0.6 (0.7)b |  | 15.0 (0.5) |
| ≥3rd | -Referent-b |  | 14.4 (0.4) |
| DIM3 |  | <0.001 |  |
| ≤100 | 2.3 (0.6)a |  | 14.7 (0.4) |
| 101-200 | 2.0 (0.6)a |  | 14.4 (0.5) |
| >200 | -Referent-b |  | 12.4 (0.5) |

a-cMain effects marked with different superscript letters differ at a level of *p* ≤ 0.05 in Tukey-Kramer´s post hoc test.

1Linear regression coefficient.

2Least squares means in kg.

3Stage of lactation (days in milk).

**Supplementary Table 4.** Multivariable general linear mixed model describing the factors associated with two-minute milk yield (kg) from 384 milking observations of 129 cows.

| Item | β1 (SE) | *p* | LSM2 (SE) | |
| --- | --- | --- | --- | --- |
| Intercept | 4.2 (0.6) | <0.001 | | – |
| Milking session |  | <0.001 | |  |
| Milking #1 | -0.6 (0.1)a |  | | 6.0 (0.3) |
| Milking #2 | -0.6 (0.2)a |  | | 6.0 (0.3) |
| Milking #3 | -Referent-b |  | | 6.5 (0.3) |
| TMY3 | 0.2 (0.03) | <0.001 | | – |
| TES4 |  | 0.6 | |  |
| Pointed | 0.4 (0.8) |  | | – |
| Flat | -1.1 (1.1) |  | | – |
| Round | -Referent- |  | | – |
| LAG5 | -0.008 (0.04) | 0.8 | | – |
| TES × LAG |  | 0.003 | |  |
| Pointed × LAG | -0.2 (0.1)a |  | | 5.1 (0.5) |
| Flat × LAG | 0.2 (0.1)a |  | | 6.8 (0.6) |
| Round × LAG | -Referent-b |  | | 6.5 (0.2) |

a-bMain effects marked with different superscript letters differ at a level of *p* ≤ 0.05 in Tukey-Kramer´s post hoc test.

1Linear regression coefficient.

2Least squares means in kg. The results are averaged over the levels of all other categorical variables included in the model and the mean lag time of 74 s.

3Total milk yield (kg).

4Teat-end shape. Classified as follows: pointed = 2 or more pointed teats, flat = 2 or more flat teats, round = 3 or 4 round teats.

5Preparation lag time (s, 1-unit = 10 s), time between first teat stripping and milking unit attachment.

**Supplementary Table 5.** Multivariable general linear mixed model describing the factors associated with milking unit-on time (s) from 384 milking observations of 129 cows.

| Item | β1 (SE) | *p* | LSM2 (SE) |
| --- | --- | --- | --- |
| Intercept | 136 (19) | <0.001 | – |
| Milking session |  | 0.02 |  |
| Milking #1 | -14 (6)a |  | 255 (8) |
| Milking #2 | -12 (4)ab |  | 241 (8) |
| Milking #3 | -Referent-bc |  | 243 (8) |
| TMY3 | 10 (1) | <0.001 | – |
| Parity |  | 0.03 |  |
| 1st | -30 (12)a |  | 230 (11) |
| 2nd | -13 (13)ab |  | 248 (12) |
| ≥3rd | -Referent-b |  | 261 (9) |
| TES4 |  | 0.02 |  |
| Pointed | 36 (15)a |  | 277 (13) |
| Flat | -21 (18)b |  | 220 (17) |
| Round | -Referent-b |  | 241 (6) |

a-cMain effects marked with different superscript letters differ at a level of *p* ≤ 0.05 in Tukey-Kramer´s post hoc test.

1Linear regression coefficient.

2Least squares means in s.

3Total milk yield (kg).

4Teat-end shape. Classified as follows: pointed = 2 or more pointed teats, flat = 2 or more flat teats, round = 3 or 4 round teats.

**Supplementary Table 6.** Multivariable general linear mixed model describing the factors associated with time in low milk flow rate (s) from 384 milking observations of 129 cows.

| Item | β1 (95% CI) | *p* | LSM2 (95% CI) |
| --- | --- | --- | --- |
| Intercept | 36.42 (24.10-55.04) | <0.001 | – |
| Milking session |  | <0.001 |  |
| Milking #1 | 1.20 (1.08-1.35)a |  | 14 (13-17) |
| Milking #2 | 1.29 (1.11-1.50)a |  | 16 (13-18) |
| Milking #3 | -Referent-b |  | 12 (11-14) |
| TMY3 | 0.94 (0.92-0.96) | <0.001 | – |
| Parity |  | 0.004 |  |
| 1st | 0.75 (0.63-0.89)a |  | 12 (10-14) |
| 2nd | 0.93 (0.76-1.13)ab |  | 15 (12-17) |
| ≥3rd | -Referent-b |  | 16 (14-18) |
| TES4 |  | 0.007 |  |
| Pointed | 0.42 (0.24-0.75) |  | – |
| Flat | 0.56 (0.23-1.32) |  | – |
| Round | -Referent- |  | – |
| LAG5 | 0.996 (0.97-1.03) | 0.8 | – |
| TES × LAG |  | <0.001 |  |
| Pointed × LAG | 1.15 (1.08-1.23)a |  | 16 (13-19) |
| Flat × LAG | 1.07 (0.97-1.19)a |  | 13 (10-16) |
| Round × LAG | -Referent-a |  | 14 (12-15) |

a-bMain effects marked with different superscript letters differ at a level of *p* ≤ 0.05 in Tukey-Kramer´s post hoc test.

1Linear regression coefficient.

2Least squares means in s. The results are averaged over the levels of all other categorical variables included in the model and the mean lag time of 74 s.

3Total milk yield (kg).

4Teat-end shape. Classified as follows: pointed = 2 or more pointed teats, flat = 2 or more flat teats, round = 3 or 4 round teats.

5Preparation lag time (s, 1-unit = 10 s); time between first teat stripping and milking unit attachment.
